# Supplementary material for: Evaluation of the population structure and genetic diversity of Plasmodium falciparum in southern China
Source: PubMed Central journal article supplement (PMC4509482; doi:10.1186/s12936-015-0786-0), 2015-07-22
Supplement: 12936_2015_786_MOESM2_ESM.pdf [file 12936_2015_786_MOESM2_ESM.pdf]

**Additional file 2. Allele frequencies at 13 microsatellite loci of the seven *plasmodium falciparum* populations in the South China.**

| MS loci<br>(13) | No.of<br>alleles | Alleles<br>(bp) | Yunnan          |                  |                     |                 | Hainan             |                  |                 | Private<br>alleles |           |
|-----------------|------------------|-----------------|-----------------|------------------|---------------------|-----------------|--------------------|------------------|-----------------|--------------------|-----------|
|                 |                  |                 | Lazan<br>(n=56) | Dehong<br>(n=40) | Tengchong<br>(n=70) | Banna<br>(n=26) | Dongfang<br>(n=83) | Ledong<br>(n=15) | Sanya<br>(n=11) |                    |           |
| <b>TA1</b>      | 1                | 134             | ...             | ...              | ...                 | ...             | 0.012              | ...              | ...             | Dongfang           |           |
|                 | 2                | 152             | 0.018           | ...              | 0.029               | ...             | ...                | ...              | ...             |                    |           |
|                 | 3                | 155             | 0.125           | ...              | 0.086               | ...             | ...                | ...              | ...             |                    |           |
|                 | 4                | 158             | 0.107           | 0.075            | 0.271               | 0.038           | ...                | ...              | 0.091           |                    |           |
|                 | 5                | 161             | 0.250           | 0.250            | 0.200               | 0.308           | 0.072              | 0.133            | 0.091           |                    |           |
|                 | 6                | 164             | 0.321           | 0.275            | 0.143               | 0.423           | 0.373              | 0.400            | 0.091           |                    |           |
|                 | 7                | 167             | 0.107           | 0.200            | 0.143               | 0.115           | 0.410              | 0.333            | ...             |                    |           |
|                 | 8                | 170             | 0.071           | 0.100            | 0.057               | 0.077           | 0.108              | ...              | 0.091           |                    |           |
|                 | 9                | 173             | ...             | 0.050            | ...                 | 0.038           | 0.012              | 0.067            | 0.545           |                    |           |
|                 | 10               | 176             | ...             | ...              | ...                 | ...             | 0.012              | 0.067            | ...             |                    |           |
|                 | 11               | 179             | ...             | 0.025            | ...                 | ...             | ...                | ...              | 0.091           |                    |           |
|                 | 12               | 185             | ...             | ...              | 0.014               | ...             | ...                | ...              | ...             |                    | Tengchong |
|                 | 13               | 188             | ...             | ...              | 0.057               | ...             | ...                | ...              | ...             |                    |           |
|                 | <b>Polya</b>     | 14              | 191             | ...              | 0.025               | ...             | ...                | ...              | ...             |                    | ...       |
| 1               |                  | 140             | 0.018           | ...              | ...                 | ...             | ...                | ...              | ...             | Lazan              |           |
| 2               |                  | 143             | 0.054           | ...              | 0.029               | ...             | ...                | ...              | ...             |                    |           |
| 3               |                  | 146             | ...             | 0.050            | 0.057               | ...             | 0.048              | 0.200            | ...             |                    |           |
| 4               |                  | 149             | 0.054           | 0.075            | 0.014               | 0.077           | ...                | ...              | ...             |                    |           |
| 5               |                  | 152             | 0.018           | 0.025            | 0.043               | 0.038           | 0.373              | ...              | ...             |                    |           |
| 6               |                  | 155             | 0.089           | 0.225            | 0.129               | 0.269           | 0.229              | 0.133            | 0.636           |                    |           |
| 7               |                  | 158             | 0.179           | 0.175            | 0.086               | 0.038           | 0.024              | ...              | ...             |                    |           |
| 8               |                  | 161             | 0.107           | 0.050            | 0.086               | ...             | 0.012              | 0.067            | 0.273           |                    |           |
| 9               |                  | 164             | 0.036           | 0.050            | 0.100               | ...             | 0.084              | ...              | ...             |                    |           |
| 10              |                  | 167             | 0.143           | 0.025            | 0.086               | 0.038           | 0.133              | 0.133            | ...             |                    |           |
| 11              | 170              | 0.179           | 0.225           | 0.229            | ...                 | 0.072           | 0.467              | 0.091            |                 |                    |           |

| MS loci<br>(13) | No.of<br>alleles | Alleles<br>(bp) | Yunnan          |                  |                     |                 | Hainan             |                  |                 | Private<br>alleles |
|-----------------|------------------|-----------------|-----------------|------------------|---------------------|-----------------|--------------------|------------------|-----------------|--------------------|
|                 |                  |                 | Lazan<br>(n=56) | Dehong<br>(n=40) | Tengchong<br>(n=70) | Banna<br>(n=26) | Dongfang<br>(n=83) | Ledong<br>(n=15) | Sanya<br>(n=11) |                    |
| <b>Polya</b>    | 12               | 173             | 0.018           | ...              | 0.043               | 0.500           | ...                | ...              | ...             |                    |
|                 | 13               | 176             | 0.089           | 0.075            | 0.071               | 0.038           | 0.024              | ...              | ...             |                    |
|                 | 14               | 182             | ...             | 0.025            | ...                 | ...             | ...                | ...              | ...             | Dehong             |
| <b>PfPk2</b>    | 15               | 185             | 0.018           | ...              | ...                 | ...             | ...                | ...              | ...             | Lazan              |
|                 | 16               | 188             | ...             | ...              | 0.029               | ...             | ...                | ...              | ...             | Tengchong          |
|                 | 1                | 144             | ...             | ...              | ...                 | 0.038           | ...                | ...              | ...             | Banna              |
|                 | 2                | 153             | ...             | ...              | ...                 | 0.115           | ...                | ...              | ...             | Banna              |
|                 | 3                | 156             | ...             | ...              | ...                 | 0.192           | ...                | ...              | ...             | Banna              |
|                 | 4                | 159             | 0.018           | 0.025            | 0.014               | 0.077           | 0.060              | ...              | ...             |                    |
|                 | 5                | 162             | 0.054           | 0.150            | 0.057               | 0.192           | 0.036              | ...              | ...             |                    |
|                 | 6                | 165             | 0.054           | 0.175            | 0.100               | 0.115           | 0.048              | ...              | 0.182           |                    |
|                 | 7                | 168             | 0.125           | 0.275            | 0.143               | ...             | 0.072              | 0.133            | 0.182           |                    |
|                 | 8                | 171             | 0.375           | 0.150            | 0.243               | 0.038           | 0.024              | 0.467            | 0.273           |                    |
|                 | 9                | 174             | 0.161           | 0.150            | 0.200               | 0.192           | 0.060              | 0.133            | ...             |                    |
|                 | 10               | 177             | 0.071           | 0.025            | 0.100               | 0.038           | 0.398              | ...              | ...             |                    |
|                 | 11               | 180             | 0.018           | ...              | 0.043               | ...             | 0.120              | ...              | ...             |                    |
|                 | 12               | 183             | 0.018           | ...              | 0.014               | ...             | ...                | 0.200            | 0.091           |                    |
|                 | 13               | 186             | 0.036           | ...              | 0.014               | ...             | 0.024              | ...              | 0.091           |                    |
|                 | 14               | 189             | 0.036           | ...              | 0.029               | ...             | 0.108              | ...              | ...             |                    |
|                 | 15               | 192             | ...             | ...              | 0.014               | ...             | 0.048              | ...              | ...             |                    |
|                 | 16               | 195             | 0.018           | 0.025            | 0.014               | ...             | ...                | ...              | ...             |                    |
|                 | 17               | 198             | 0.018           | 0.000            | 0.014               | ...             | ...                | ...              | ...             |                    |
|                 | 18               | 201             | ...             | 0.025            | ...                 | ...             | ...                | ...              | ...             | Dehong             |
| 19              | 204              | ...             | ...             | ...              | ...                 | ...             | ...                | 0.182            | Sanya           |                    |
| 20              | 207              | ...             | ...             | ...              | ...                 | ...             | 0.067              | ...              | Ledong          |                    |
| <b>TA81</b>     | 1                | 105             | ...             | 0.025            | ...                 | ...             | ...                | ...              | ...             | Dehong             |
|                 | 2                | 108             | ...             | ...              | 0.029               | ...             | ...                | ...              | ...             | Tengchong          |

| MS loci<br>(13) | No. of<br>alleles | Alleles<br>(bp) | Yunnan          |                  |                     |                 | Hainan             |                  |                 | Private<br>alleles        |       |
|-----------------|-------------------|-----------------|-----------------|------------------|---------------------|-----------------|--------------------|------------------|-----------------|---------------------------|-------|
|                 |                   |                 | Lazan<br>(n=56) | Dehong<br>(n=40) | Tengchong<br>(n=70) | Banna<br>(n=26) | Dongfang<br>(n=83) | Ledong<br>(n=15) | Sanya<br>(n=11) |                           |       |
| <b>TA81</b>     | 3                 | 111             | 0.071           | 0.100            | 0.057               | ...             | ...                | 0.067            | ...             |                           |       |
|                 | 4                 | 114             | 0.321           | 0.175            | 0.200               | 0.077           | 0.072              | 0.200            | 0.182           |                           |       |
|                 | 5                 | 117             | 0.286           | 0.150            | 0.157               | 0.115           | 0.434              | 0.267            | 0.545           |                           |       |
|                 | 6                 | 120             | 0.054           | 0.225            | 0.014               | 0.385           | 0.265              | 0.067            | ...             |                           |       |
|                 | 7                 | 123             | 0.143           | 0.150            | 0.214               | 0.385           | 0.133              | 0.200            | 0.182           |                           |       |
|                 | 8                 | 126             | 0.018           | 0.150            | 0.157               | ...             | 0.036              | ...              | 0.091           |                           |       |
|                 | 9                 | 129             | 0.071           | ...              | 0.114               | 0.038           | 0.048              | 0.200            | ...             |                           |       |
|                 | 10                | 132             | 0.036           | ...              | 0.043               | ...             | 0.012              | ...              | ...             |                           |       |
|                 | 11                | 135             | ...             | 0.025            | ...                 | ...             | ...                | ...              | ...             |                           |       |
|                 | 12                | 141             | ...             | ...              | 0.014               | ...             | ...                | ...              | ...             |                           |       |
|                 | <b>TA109</b>      | 1               | 137             | ...              | ...                 | ...             | 0.038              | ...              | ...             |                           | ...   |
| 2               |                   | 152             | 0.018           | 0.025            | ...                 | ...             | 0.301              | 0.600            | 0.455           |                           |       |
| 3               |                   | 155             | 0.714           | 0.450            | 0.843               | ...             | 0.241              | 0.333            | 0.545           |                           |       |
| 4               |                   | 158             | 0.179           | 0.400            | 0.043               | 0.538           | 0.289              | ...              | ...             |                           |       |
| 5               |                   | 161             | ...             | ...              | ...                 | 0.192           | 0.169              | ...              | ...             |                           |       |
| 6               |                   | 164             | ...             | ...              | ...                 | ...             | ...                | 0.067            | ...             | Ledong                    |       |
| 7               |                   | 167             | 0.071           | 0.050            | 0.100               | ...             | ...                | ...              | ...             |                           |       |
| 8               |                   | 170             | 0.018           | 0.025            | 0.014               | 0.192           | ...                | ...              | ...             |                           |       |
| 9               |                   | 179             | ...             | 0.025            | ...                 | ...             | ...                | ...              | ...             | Dehong<br>Dehong<br>Banna |       |
| 10              |                   | 185             | ...             | 0.025            | ...                 | ...             | ...                | ...              | ...             |                           |       |
| 11              |                   | 188             | ...             | ...              | ...                 | 0.038           | ...                | ...              | ...             |                           |       |
| <b>TA42</b>     | 1                 | 172             | ...             | 0.025            | ...                 | ...             | ...                | ...              | ...             | Dehong                    |       |
|                 | 2                 | 175             | 0.018           | ...              | 0.014               | ...             | ...                | ...              | ...             |                           |       |
|                 | 3                 | 178             | 0.411           | 0.875            | 0.871               | 0.077           | 0.157              | 0.133            | 0.091           |                           |       |
|                 | 4                 | 181             | 0.536           | 0.025            | 0.043               | 0.231           | 0.735              | 0.533            | 0.727           |                           |       |
|                 | 5                 | 184             | ...             | ...              | ...                 | 0.385           | 0.024              | 0.200            | ...             |                           |       |
|                 | 6                 | 187             | ...             | ...              | ...                 | 0.038           | ...                | ...              | ...             |                           | Banna |



| MS loci<br>(13) | No.of<br>alleles | Alleles<br>(bp) | Yunnan          |                  |                     |                 | Hainan             |                  |                 | Private<br>alleles |
|-----------------|------------------|-----------------|-----------------|------------------|---------------------|-----------------|--------------------|------------------|-----------------|--------------------|
|                 |                  |                 | Lazan<br>(n=56) | Dehong<br>(n=40) | Tengchong<br>(n=70) | Banna<br>(n=26) | Dongfang<br>(n=83) | Ledong<br>(n=15) | Sanya<br>(n=11) |                    |
| <b>ARA2</b>     | 2                | 64              | 0.018           | ...              | 0.029               | ...             | 0.012              | ...              | ...             |                    |
|                 | 3                | 67              | 0.018           | 0.025            | 0.043               | 0.231           | 0.108              | ...              | ...             |                    |
|                 | 4                | 70              | 0.375           | 0.100            | 0.214               | 0.231           | 0.410              | 0.267            | 0.545           |                    |
|                 | 5                | 73              | 0.107           | 0.150            | 0.100               | 0.308           | 0.084              | 0.267            | 0.182           |                    |
|                 | 6                | 76              | 0.357           | 0.425            | 0.414               | 0.115           | 0.120              | 0.333            | 0.182           |                    |
|                 | 7                | 79              | 0.071           | 0.200            | 0.071               | ...             | 0.096              | 0.067            | ...             |                    |
|                 | 8                | 82              | ...             | 0.025            | 0.086               | 0.115           | 0.169              | 0.067            | 0.091           |                    |
|                 | 9                | 85              | 0.054           | 0.025            | 0.029               | ...             | ...                | ...              | ...             |                    |
|                 | 10               | 97              | ...             | ...              | 0.014               | ...             | ...                | ...              | ...             |                    |
|                 | <b>2490</b>      | 1               | 74              | ...              | 0.050               | 0.029           | ...                | ...              | ...             |                    |
| 2               |                  | 77              | 0.018           | ...              | 0.043               | ...             | 0.012              | ...              | 0.545           |                    |
| 3               |                  | 80              | 0.232           | 0.600            | 0.529               | 0.846           | 0.518              | 0.067            | 0.091           |                    |
| 4               |                  | 83              | 0.446           | 0.350            | 0.357               | 0.115           | 0.410              | 0.667            | 0.273           |                    |
| <b>Pfg377</b>   | 5                | 86              | 0.304           | ...              | 0.043               | 0.038           | 0.060              | 0.267            | 0.091           | Tengchong          |
|                 | 1                | 80              | ...             | ...              | 0.014               | ...             | ...                | ...              | ...             |                    |
|                 | 2                | 86              | 0.018           | 0.075            | ...                 | ...             | ...                | ...              | ...             |                    |
|                 | 3                | 89              | 0.054           | 0.650            | 0.171               | ...             | 0.349              | 0.533            | 0.273           |                    |
|                 | 4                | 92              | 0.786           | 0.250            | 0.714               | 0.038           | 0.651              | 0.467            | 0.636           |                    |
|                 | 5                | 95              | 0.143           | 0.025            | 0.100               | 0.769           | ...                | ...              | 0.091           |                    |
| <b>B5M2</b>     | 6                | 98              | ...             | ...              | ...                 | 0.192           | ...                | ...              | ...             | Banna              |
|                 | 1                | 130             | ...             | 0.025            | ...                 | ...             | ...                | ...              | ...             |                    |
|                 | 2                | 136             | 0.036           | 0.075            | 0.029               | ...             | ...                | ...              | ...             |                    |
|                 | 3                | 139             | 0.214           | 0.350            | 0.314               | 0.077           | 0.036              | ...              | ...             |                    |
|                 | 4                | 142             | 0.107           | 0.025            | 0.029               | 0.231           | 0.675              | 0.400            | 0.636           |                    |
|                 | 5                | 145             | 0.036           | 0.075            | 0.057               | 0.308           | 0.229              | 0.467            | ...             |                    |
|                 | 6                | 148             | ...             | 0.050            | 0.043               | 0.115           | 0.060              | 0.133            | 0.091           |                    |
| 7               | 151              | 0.071           | 0.050           | ...              | ...                 | ...             | ...                | 0.273            | Dehong          |                    |

| MS loci<br>(13) | No.of<br>alleles | Alleles<br>(bp) | Yunnan          |                  |                     |                 | Hainan             |                  |                 | Private<br>alleles |
|-----------------|------------------|-----------------|-----------------|------------------|---------------------|-----------------|--------------------|------------------|-----------------|--------------------|
|                 |                  |                 | Lazan<br>(n=56) | Dehong<br>(n=40) | Tengchong<br>(n=70) | Banna<br>(n=26) | Dongfang<br>(n=83) | Ledong<br>(n=15) | Sanya<br>(n=11) |                    |
| <b>B5M2</b>     | 8                | 154             | 0.089           | 0.275            | 0.057               | 0.192           | ...                | ...              | ...             | Banna              |
|                 | 9                | 157             | 0.232           | 0.025            | 0.371               | 0.077           | ...                | ...              | ...             |                    |
|                 | 10               | 160             | 0.107           | 0.025            | 0.043               | ...             | ...                | ...              | ...             |                    |
|                 | 11               | 163             | 0.107           | 0.025            | 0.057               | ...             | ...                | ...              | ...             |                    |
| <b>C1M8</b>     | 1                | 128             | ...             | ...              | ...                 | 0.077           | ...                | ...              | ...             |                    |
|                 | 2                | 131             | ...             | ...              | ...                 | 0.038           | 0.036              | ...              | ...             |                    |
|                 | 3                | 143             | 0.036           | ...              | 0.014               | ...             | ...                | ...              | ...             |                    |
|                 | 4                | 149             | 0.036           | ...              | 0.043               | ...             | ...                | ...              | ...             |                    |
|                 | 5                | 152             | 0.054           | 0.125            | 0.057               | ...             | ...                | ...              | ...             |                    |
|                 | 6                | 155             | 0.036           | 0.025            | 0.100               | 0.192           | ...                | ...              | ...             |                    |
|                 | 7                | 158             | 0.143           | 0.050            | 0.043               | ...             | ...                | ...              | ...             |                    |
|                 | 8                | 161             | 0.268           | 0.100            | 0.143               | 0.115           | 0.024              | 0.067            | 0.091           |                    |
|                 | 9                | 164             | 0.089           | 0.150            | 0.029               | 0.038           | 0.084              | 0.400            | 0.273           |                    |
|                 | 10               | 167             | 0.054           | 0.075            | 0.157               | 0.346           | 0.157              | ...              | 0.091           |                    |
|                 | 11               | 170             | 0.054           | 0.250            | 0.086               | 0.038           | ...                | 0.067            | ...             |                    |
|                 | 12               | 173             | 0.018           | 0.025            | 0.029               | ...             | 0.157              | ...              | 0.091           |                    |
|                 | 13               | 176             | 0.054           | 0.050            | 0.129               | 0.115           | 0.386              | 0.067            | 0.364           |                    |
|                 | 14               | 179             | 0.018           | 0.025            | 0.057               | ...             | 0.084              | ...              | ...             |                    |
|                 | 15               | 182             | 0.036           | ...              | 0.057               | ...             | ...                | ...              | 0.091           |                    |
|                 | 16               | 185             | 0.018           | 0.050            | ...                 | ...             | ...                | ...              | ...             |                    |
|                 | 17               | 188             | 0.018           | 0.025            | 0.014               | 0.038           | ...                | 0.133            | ...             |                    |
|                 | 18               | 191             | 0.054           | ...              | 0.029               | ...             | 0.036              | 0.200            | ...             |                    |
|                 | 19               | 194             | 0.018           | ...              | ...                 | ...             | 0.036              | 0.067            | ...             |                    |
|                 | 20               | 197             | ...             | 0.050            | 0.014               | ...             | ...                | ...              | ...             |                    |
