# Supplementary material for: Evaluation of the population structure and genetic diversity of Plasmodium falciparum in southern China
Source: PubMed Central journal article supplement (PMC4509482; doi:10.1186/s12936-015-0786-0), 2015-07-22
Supplement: 12936_2015_786_MOESM3_ESM.pdf [file 12936_2015_786_MOESM3_ESM.pdf]

**Additional file 3: Summary of microsatellite markers and the genetic diversity of *Plasmodium falciparum* in southern China**

| <b>Locus</b>                   | <b>GeneBank accession number</b> | <b>Chromosome</b> | <b>Allele size(bp)</b> | <b>Number of alleles</b> | <b>He</b>         |
|--------------------------------|----------------------------------|-------------------|------------------------|--------------------------|-------------------|
| <b>TA1</b>                     | AF010507                         | 6                 | 134-191                | 14                       | 0.817             |
| <b>Poly<math>\alpha</math></b> | L18785                           | 4                 | 140-188                | 16                       | 0.892             |
| <b>PfPK2</b>                   | X63648                           | 12                | 144-207                | 20                       | 0.891             |
| <b>TA81</b>                    | AF010510                         | 5                 | 105-141                | 12                       | 0.831             |
| <b>TA109</b>                   | AF010508                         | 6                 | 137-188                | 11                       | 0.683             |
| <b>TA42</b>                    | AF010543                         | 5                 | 172-244                | 11                       | 0.636             |
| <b>TA60</b>                    | AF010556                         | 13                | 64-94                  | 9                        | 0.697             |
| <b>TA87</b>                    | AF010571                         | 6                 | 84-120                 | 12                       | 0.796             |
| <b>ARA2</b>                    | X17848                           | 11                | 61-97                  | 10                       | 0.796             |
| <b>2490</b>                    | T02490                           | 10                | 74-86                  | 5                        | 0.629             |
| <b>Pfg377</b>                  | L04161                           | 12                | 80-98                  | 6                        | 0.58              |
| <b>B5M2</b>                    | G44403                           | 7                 | 130-163                | 11                       | 0.841             |
| <b>C1M8</b>                    | G38013                           | 1                 | 128-197                | 20                       | 0.91              |
| <b>Mean<math>\pm</math>SE</b>  |                                  |                   |                        | 12.154 $\pm$ 1.285       | 0.769 $\pm$ 0.031 |
