# Supplementary material for: Evaluation of the population structure and genetic diversity of Plasmodium falciparum in southern China
Source: PubMed Central journal article supplement (PMC4509482; doi:10.1186/s12936-015-0786-0), 2015-07-22
Supplement: 12936_2015_786_MOESM5_ESM.pdf [file 12936_2015_786_MOESM5_ESM.pdf]

**Additional file 5: Selected marker sets to differentiate *P.falciparum* isolates between Yunnan and Hainan provinces with high accuracy**

| Marker set        | Correctly Classified Instances (%) | Class      |            |
|-------------------|------------------------------------|------------|------------|
|                   |                                    | Yunnan (%) | Hainan (%) |
| B5M2              | 84.314                             | 82.7       | 87.2       |
| TA1,B5M2          | 89.543                             | 92.4       | 84.4       |
| Pfg377,B5M2       | 90.523                             | 90.4       | 90.8       |
| ARA2,B5M2         | 85.621                             | 87.8       | 81.7       |
| TA81,B5M2         | 80.719                             | 86.3       | 83.5       |
| TA60,B5M2         | 89.869                             | 89.8       | 89.9       |
| TA42,Pfg377       | 82.026                             | 82.7       | 80.7       |
| TA42,B5M2         | 87.909                             | 88.8       | 86.2       |
| TA1,Pfg377,B5M2   | 94.118                             | 97         | 89         |
| TA109,TA42,B5M2   | 91.177                             | 94.4       | 85.3       |
| TA109,TA87,Pfg377 | 87.255                             | 92.4       | 84.4       |
| TA109,Pfg377,B5M2 | 90.196                             | 94.4       | 82.6       |
| TA42,TA60,B5M2    | 88.562                             | 92.9       | 80.7       |
| TA42,TA87,B5M2    | 89.216                             | 92.9       | 82.6       |

| Marker set             | Correctly Classified Instances (%) | Class      |            |
|------------------------|------------------------------------|------------|------------|
|                        |                                    | Yunnan (%) | Hainan (%) |
| TA42,Pfg377,B5M2       | 90.85                              | 92.9       | 87.2       |
| TA60,TA87,B5M2         | 90.523                             | 93.4       | 85.3       |
| TA60,2490,B5M2         | 88.562                             | 91.9       | 82.6       |
| TA60,Pfg377,B5M2       | 91.83                              | 93.4       | 89         |
| TA87,Pfg377,B5M2       | 91.503                             | 92.9       | 89         |
| 2490,Pfg377,B5M2       | 92.157                             | 92.4       | 91.7       |
| TA1,TA109,Pfg377,B5M2  | 90.85                              | 98         | 78         |
| TA1,TA60,Pfg377,B5M2   | 90.523                             | 97.5       | 78         |
| TA1,TA87,Pfg377,B5M2   | 90.523                             | 97.5       | 78         |
| TA1,2490,Pfg377,B5M2   | 89.869                             | 97         | 78.9       |
| TA109,TA42,Pfg377,B5M2 | 90.523                             | 97         | 78.9       |
| TA109,TA87,Pfg377,B5M2 | 91.177                             | 97.5       | 79.8       |
| TA109,ARA2,Pfg377,B5M2 | 90.196                             | 97.5       | 78         |
| TA109,2490,Pfg377,B5M2 | 91.503                             | 98         | 80.7       |
